# Supplementary material for: An automated carcinogenic potency categorization approach for nitrosamine drug substance-related impurities
Source: Royal Society of Chemistry journal article supplement (doi:10.1039/d3gc03478j), 2023-11-24

## Supporting Information

1. Assessment on Parent amines and Related Structures
2. Brief Introduction on the Web Application
3. Data Preparation and Visualization
4. Unrecognized structures in the dataset

### 1. Assessment on Parent amines and Related Structures.

To do a quick analysis when developing a chemical route for API production, we think about implementing CPCA approach earlier in stage. Except for detecting *N*-nitrosamine, two other structures as given in Figure S1 could also be considered in our algorithm. Hypothetically, structure in Figure S1 a) can be transformed to *N*-nitrosamine shown Figure S1 c) and Figure S1 b) structure could be transformed to *N*-nitrosamine given in Figure S1 d). The carcinogenic potency categorization approach will be applied to calculate the potency category from which we could have a general understanding of the risk of chemical intermediate by taking their potential *N*-nitrosamine into account.

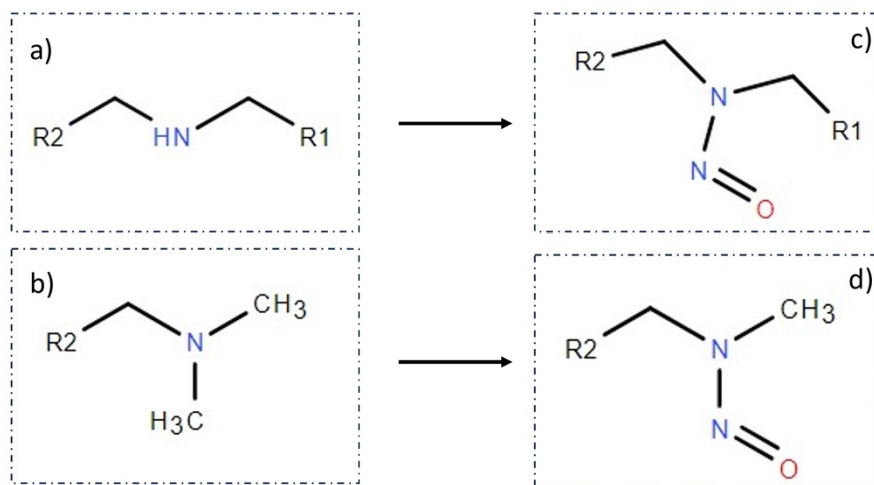

## 2. Brief Introduction on the Web Application

- # Nitrosamine Potency Category
- If you have any questions or problems, please reach out to [jjazhou.zhu@novartis.com](mailto:jjazhou.zhu@novartis.com)
- Molecule
- C1=C(C2=NC(N(CCNCC)N=O)=CC=2)C(OC)=CC(C)=C1
- 
- Calculate the Potency Category
- Calculate Potency Score
- Count of hydrogen atoms on each  $\alpha$ -carbon [0, 2] and corresponding  $\alpha$ -Hydrogen Score is 3
- Chains of  $\geq 5$  consecutive non-hydrogen atoms (cyclic or acyclic) on both side, individual Deactivating Feature Score +1
- Score: 4
- Potency Category 4: AI = 1500 ng/day
- This is flowchart on assigning p
- 
- ```
graph TD
    Q1[Does N-nitrosamine have any hydrogens on its alpha-carbons?] -- No --> Q2[Does N-nitrosamine have more than one alpha-hydrogen on one or both sides of the N-nitroso group?]
    Q1 -- Yes --> Q2
    Q2 -- No --> Q3[Does N-nitrosamine have a tertiary alpha-carbon?]
    Q2 -- Yes --> Q3
    Q3 -- Yes --> Q4[Calculate Potency Score]
    Q3 -- No --> Q4
    Q4 -- "Is score >= 4?" -- Yes --> Q5[Is Potency Score = 3?]
    Q4 -- "Is score >= 4?" -- No --> Q5
    Q5 -- Yes --> Q6[Is Potency Score = 2?]
    Q5 -- No --> Q6
    Q6 -- Yes --> Q7[Is Potency Score <= 1?]
    Q6 -- No --> Q7
    Q7 -- Yes --> End[ ]
    Q7 -- No --> End
```

looks like

- # Nitrosamine Potency Category

If you have any questions or problems, please reach out to [jjazhou.zhu@novartis.com](mailto:jjazhou.zhu@novartis.com)

Molecule

C1=C(C2N=NC(N(CCNC)N=O)=CC=2)C(OC)=CC(C)=C1

H  
C  
N  
O  
S  
P  
F  
Cl  
Br  
I  
PT  
[A]

Calculate the Potency Category

Calculate Potency Score

Count of hydrogen atoms on each  $\alpha$ -carbon [0, 2] and corresponding  $\alpha$ -Hydrogen Score is 3

Chains of  $\geq 5$  consecutive non-hydrogen atoms (cyclic or acyclic) on both side, Individual Deactivating Feature Score +1

Score: 4

Potency Category 4 : AI = 1500 ng/day

This is flowchart on assigning

```

graph TD
    Q1[Does N-nitrosamine have any hydrogens on its alpha-carbons?] -- No --> CS[Calculate Potency Score]
    Q1 -- Yes --> Q2[Does N-nitrosamine have more than one alpha-hydrogen on one or both sides of the N-nitroso group?]
    Q2 -- No --> CS
    Q2 -- Yes --> Q3[Does N-nitrosamine have a tertiary alpha-carbon?]
    Q3 -- No --> CS
    Q3 -- Yes --> Q4[Is Potency Score = 3?]
    Q4 -- No --> Q5[Is Potency Score = 2?]
    Q4 -- Yes --> CS
    Q5 -- No --> Q6[Is Potency Score <= 1?]
    Q5 -- Yes --> CS
    Q6 -- No --> CS
    Q6 -- Yes --> CS
  
```

- Once you have entered the molecule and you made further changes to the molecule, click apply button before you move on

The screenshot displays the Molecule Editor interface. On the left, the chemical structure of a molecule is shown, with its SMILES code: C1=C(C2N=NC(N(CCNCC)N=O)=CC=2)C(OC)=CC(C)=C1. The interface includes a 'Reset' button and an 'Apply' button. On the right, a flowchart titled 'This is flowchart on assigning potency category' is shown. The flowchart starts with the question 'Does N-nitrosamine have any hydrogens on its α-carbons?'. If 'No', it leads to 'Potency Category 5 AI = 1500 ng/day'. If 'Yes', it asks 'Does N-nitrosamine have more than one α-hydrogen on one or both sides of the N-nitroso group?'. If 'No', it leads to 'Potency Category 5 AI = 1500 ng/day'. If 'Yes', it asks 'Does N-nitrosamine have a tertiary α-carbon?'. If 'Yes', it leads to 'Potency Category 5 AI = 1500 ng/day'. If 'No', it asks 'Calculate Potency Score\*\* Is score ≥4?'. If 'Yes', it leads to 'Potency Category 4 AI = 1500 ng/day'. If 'No', it asks 'Is Potency Score = 3?'. If 'Yes', it leads to 'Potency Category 3 AI = 400 ng/day'. If 'No', it asks 'Is Potency Score = 2?'. If 'Yes', it leads to 'Potency Category 2 AI = 100 ng/day'. If 'No', it leads to 'Potency Category 1'. The flowchart also includes a 'Download Report.docx' button.

- Once everything is ready, click on the 'calculate the potency category' button. The results will be given, and you can also download the report file. If you are not good with the template, you can edit the code to make your own template.

The screenshot shows the Molecule Editor interface with the 'Calculate the Potency Category' button highlighted. The chemical structure is the same as in the previous screenshot. The results of the calculation are displayed on the right: 'Calculate Potency Score', 'Count of hydrogen atoms on each α-carbon [0, 2] and corresponding α-Hydrogen Score is 3', 'Chains of ≥5 consecutive non-hydrogen atoms (cyclic or acyclic) on both side, Individual Deactivating Feature Score +1', 'Score: 4', and 'Potency Category 4 : AI = 1500 ng/day'. A 'Download Report.docx' button is also visible.

### 3. Data Preparation and Visualization

Raw code could be found through [github link](#).

1. The smiles strings in red box will iteratively be calculated with our code, which is CPCA.py in [GitHub link](#), calculated scores will be generated for each row and append to this excel sheet as given in the red box. A new csv file will be prepared used for further data analysis.

| RowID | Structure                                                | pKaH of parer | overall potency category               | Average M/CAS (Unic CAS (Count | calculate_scor |
|-------|----------------------------------------------------------|---------------|----------------------------------------|--------------------------------|----------------|
| Row0  | [H][C@]13N[C@]3([H])CN(C1)c2nc(C)c(C)c2)N=O              | 6.653855397   | 1 potency-reducing feature             | 273.1189                       | 3              |
| Row1  | [H][C@]11(CN[C@]1([H])C=O)CN(N=O)c2nc(C)c(C)c2           | -0.81360723   | 1 potency-reducing feature             | 289.1183                       | 4              |
| Row2  | [H][C@]11(NC[C@]1([H])C=O)CN(N=O)c2nc(C)c(C)c2           | 1.44848647    | 1 potency-reducing feature             | 289.1183                       | 4              |
| Row3  | FC(F)(F)CSCC1NS(=O)(=O)c2cc(S(N)=O)c(C)c2N1N=O           | 5.06490545    | 1 potency-reducing feature             | 454.8531 96782-87-             |                |
| Row4  | N(CC#C)(Cc1ccccc1)N=O                                    | 6.511025395   | 0 potent feature                       | 174.1996 555-57-7              | 1              |
| Row5  | [H][C@]2(OC(=O)C=1SC=CC=1)CN([C@]([H])(C2)C(O)=O)N=O     | 6.434326895   | 11 both, medium but review             | 270.282                        | 6              |
| Row6  | [O-][N+](=O)C1=CC(CN(CP(O)(O)=O)N=O)=C2NC(=O)C(O)=NC2=C1 | 3.313356046   | 0 potent feature                       | 359.1893                       | 0              |
| Row7  | C1C=2C=CC(C1)=C(N1CCN(CC1)N=O)C=2                        | 7.328533637   | 0 no features from either list, medium | 260.1201                       | 3              |
| Row8  | C1C2=CC=CC(N1CCN(CC1)N=O)=C2C1                           | 7.328533637   | 0 no features from either list, medium | 260.1201 2036070-4             | 3              |
| Row9  | C1c2cc(C)c(Cc1CCN(CC1)N=O)c2                             | 4.448411192   | 0 no features from either list, medium | 260.1201                       | 3              |
| Row10 | C1C=1C=CC=2SCCCCN(N=O)C=2C=1                             | 2.174618665   | 1 potency-reducing feature             | 242.7252                       | 4              |
| Row11 | C1C1=CC=2N(C(NC(=O)C=2C=C1S(N)=O)CC)N=O                  | 0.30668435    | 1 potency-reducing feature             | 318.7369                       |                |
| Row12 | C1C1=CC=2N(C(N(C)S(=O)(=O)C=2C=C1S(N)=O)C(OC)=O)N=O      | 4.70387596    | 1 potency-reducing feature             | 398.7999                       |                |
| Row13 | Fc2cc(N1CCN(CC1)N=O)c(F)c2                               | 7.6454682     | 0 no features from either list, medium | 227.211                        | 3              |
| Row14 | Fc2cc(F)cc(N(C1CN(C1)N=O)S(C)(=O)=O)c2                   | 4.96045428    | 0 no features from either list, medium | 291.2746                       | 1              |
| Row15 | N1(CCC(=CC1)c2ncccc2)N=O                                 | 8.527904377   | 0 potent feature                       | 189.2142                       | 3              |
| Row16 | S2CN(CN(Cc1ccccc1)C2=S)N=O                               | 6.318314764   | 0 no features from either list, medium | 253.3438                       | 6              |
| Row17 | OC(=N)N=NC=1C=C(C(O)C=O)C(N(C)N=O)=CC=1O                 | -0.02099206   | 11 both, medium but review             | 281.2252                       | 2              |
| Row18 | OC(=N)N=NC=1C=C(C(C(=O)S(O)=O)=O)C(N(C)N=O)=CC=1O        | 7.75997122    | 11 both, medium but review             | 345.2888                       | 2              |
| Row19 | C1c1ccc(OCCCN(C)N=O)c(C)c1                               | 9.153579318   | 0 potent feature                       | 263.1207                       | 1              |
| Row20 | C1c2cccc(N1CCN(CC1)N=O)c2                                | 7.75753564    | 0 no features from either list, medium | 225.6751 19794-93-             | 3              |
| Row21 | C1c2cccc2N1CCN(CC1)N=O                                   | 6.936446009   | 0 no features from either list, medium | 225.6751                       | 3              |
| Row22 | C1C=1C=CC=CC=1NC(CN(CC)N=O)=O                            | 6.935738438   | 0 potent feature                       | 241.6745                       | 2              |
| Row23 | C1c1ccc(C(OCCCN(C)N=O)cc1N                               | 6.572145266   | 0 potent feature                       | 257.6739                       | 1              |
| Row24 | C1c2nc(SC1CCN(CC1)N=O)ccc2                               | 8.978613036   | 0 no features from either list, medium | 257.7399                       | 3              |
| Row25 | FC=2C=CC(N1CCN(CC1)N=O)=CC=2                             | 9.920575558   | 0 no features from either list, medium | 209.2206 103377-41             | 3              |
| Row26 | FC=2C=CC=CC=2N1CCN(CC1)N=O                               | 7.790558579   | 0 no features from either list, medium | 209.2206                       | 3              |
| Row27 | N(C)CC=Cc1ccccc1)N=O                                     | 7.568886412   | 0 potent feature                       | 176.2155                       | 2              |
| Row28 | [H]1C(CN(C)N=O)=C([H])c1ccccc1                           | 7.568886412   | 0 potent feature                       | 176.2155 65472-88-             | 2              |

2. The calculated scores will be assigned with potency categories based on the CPCA rules.

```
category_list = []
for i in score_list:
    if not i:
        category_list.append('Potency Category_5')
    elif np.isnan(float(i)):
        category_list.append('Potency Category_5')
    elif int(i) >= 4:
        category_list.append('Potency Category_4')
    elif int(i) == 3:
        category_list.append('Potency Category_3')
    elif int(i) == 2:
        category_list.append('Potency Category_2')
    elif int(i) <= 1:
        category_list.append('Potency Category_1')

data_df['potency_category'] = category_list
```

- Once the categories are assigned to each molecule, an heat map will be created based on the two columns which are 'overall potency category' and 'potency\_category'. The previous one is the raw category assigned by Schlingemann,Joerg,et al. The latter one is based on the CPCA rules.

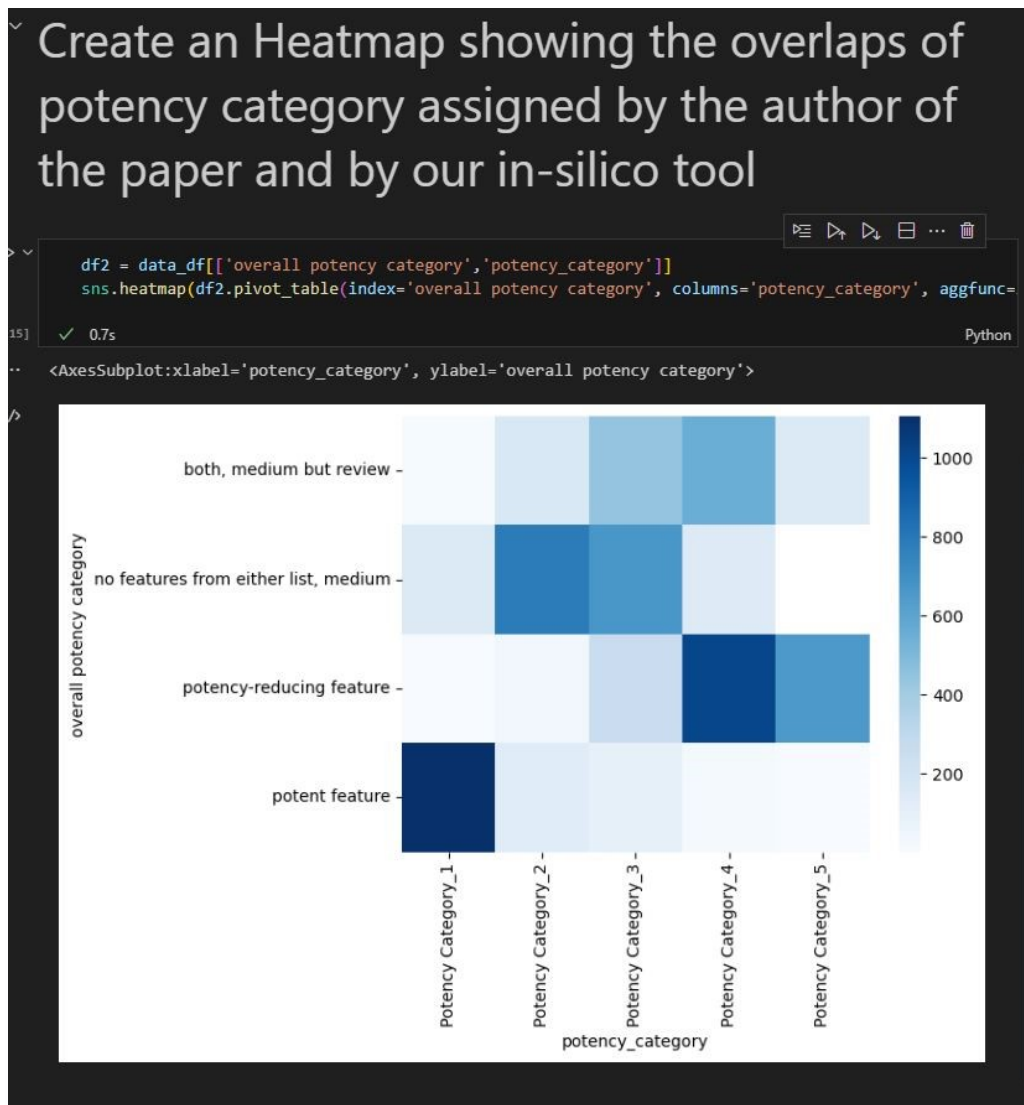



4. A boxplot along with the striplot are also provided using seaborn package in python to visualize the distribution of the pka values of their parent amines under different potency categories. 75%, 50% and 25% percentile of the pka values are given in plot. The detailed code is given as below.

```
import seaborn as sns
import matplotlib.pyplot as plt

sns.set_theme(style="ticks")

# Initialize the figure with a logarithmic x axis
f, ax = plt.subplots(figsize=(7, 6))

# Plot the orbital period with horizontal boxes
sns.boxplot(x='potency_category', y='pKaH of parent amine', data=data_df,
            whis=[0, 100], width=.6, palette="vlag", order=['Potency Category_1', 'Potency Category_2', 'Potency Category_3', 'Potency Category_4', 'Potency Category_5'])

# Add in points to show each observation
sns.stripplot(x='potency_category', y='pKaH of parent amine', data=data_df,
              size=1, color=".3", linewidth=0, order=['Potency Category_1', 'Potency Category_2', 'Potency Category_3', 'Potency Category_4', 'Potency Category_5'])

# Tweak the visual presentation
ax.xaxis.grid(True)
ax.set(ylabel="pKaH of parent amine")
sns.despine(trim=True, left=True)

ax.set_xticklabels(ax.get_xticklabels(), fontsize=8)
```

Python

```
[Text(0, 0, 'Potency Category_1'),
Text(1, 0, 'Potency Category_2'),
Text(2, 0, 'Potency Category_3'),
Text(3, 0, 'Potency Category_4'),
Text(4, 0, 'Potency Category_5')]
```

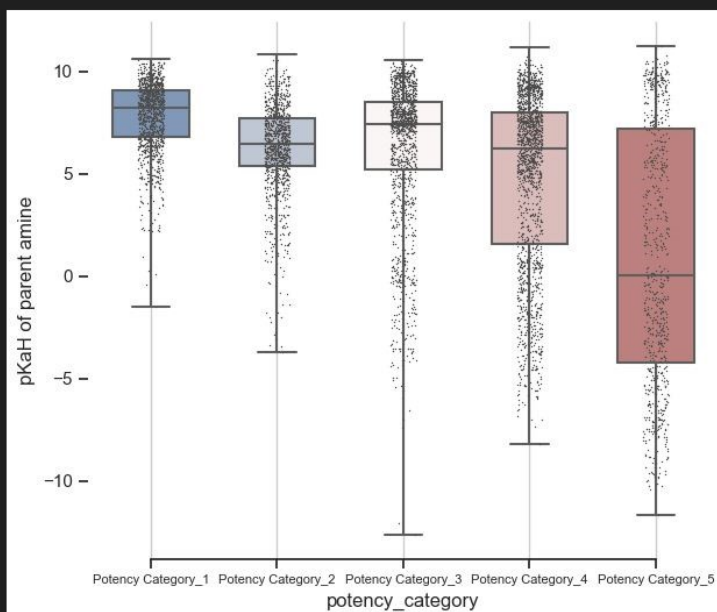

#### 4. Unrecognized structures in the dataset

16 unrecognized structures are given as below, invalid pattern can be found in all of given structures (where the structures are generated in ChemDraw Software based on the SMILES string)

Row479

O(CCN(N=O)c1ncnc(c1)-n3ncc(-n2nncc2)c3=O)CC=O

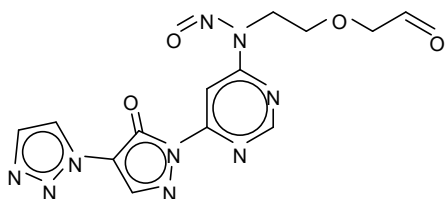

Row813

N(CCCC)(CCN=c1nc(no1)-c2cccc2)N=O

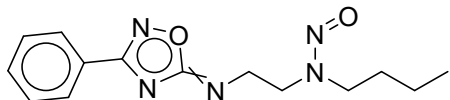

Row1354

N1(CCC(CC1)n2nc(c(CC)c2=O)-c3cccc3)N=O

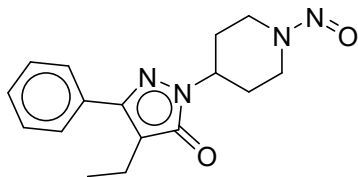

Row1489

N1(CCN(CC1)N=O)CCc2nc3n(CC(C)C)c(=O)n(C)c(=O)c3n2

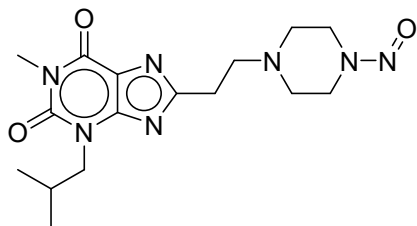

Row1759

N(C)(CCC(CC=O)n1nc(c(CC)c1=O)-c2ccccc2)N=O

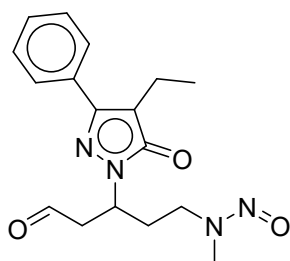

Row2721

OCc2nn(C)c(=NCCCOc1cccc(CN(CCCCC=O)N=O)c1)n2

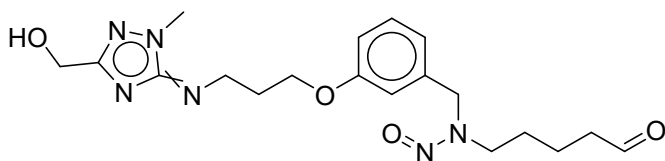

Row3161

O(CCCN=c1nc(CS(C)(=O)=O)nn1C)c2cccc(CN(CCCCC=O)N=O)c2

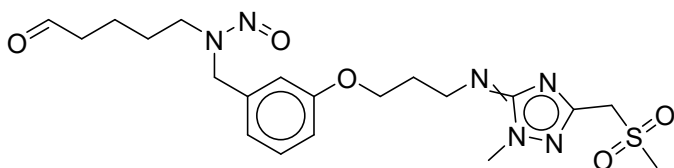

Row3299

N1(CCC(CC1)n4nc(-c2ccccc2)c(Cc3ccccc3)c4=O)N=O



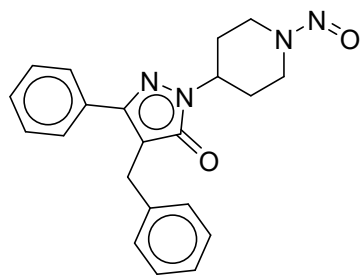

Row3736

N(C)(CCC(CC=O)N2Nc(c(Cc1ccccc1)c2=O)-c3ccccc3)N=O

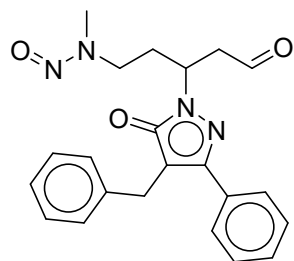

Row3996

[H][C@@](OCCN(Cc1nn(P(O)(O)=O)c(=O)n1)N=O)(O[C@@]([H])(C)c2cc(C(F)(F)F)cc(C(F)(F)F)c2)C(=O)c3ccc(F)cc3

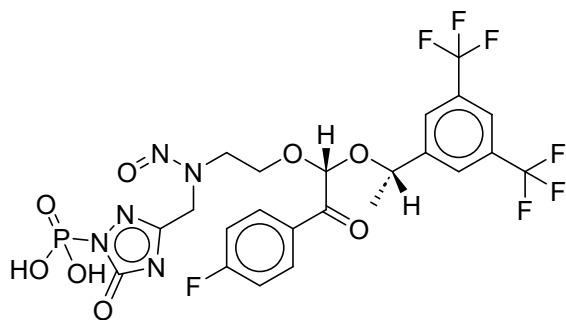

Row3997

[H][C@@](OCC=O)(O[C@@]([H])(C)c1cc(C(F)(F)F)cc(C(F)(F)F)c1)[C@@]([H])(N(Cc2nn(P(O)(O)=O)c(=O)n2)N=O)c3ccc(F)cc3

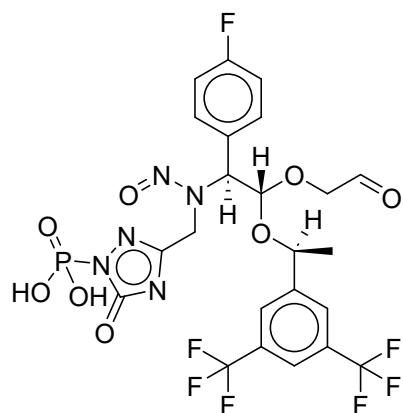

Row5285

N(CCN(C(c1ccccc1)c2ccccc2)N=O)(CCc3nc4n(CC(C)C)c(=O)n(C)c(=O)c4n3)CC=O

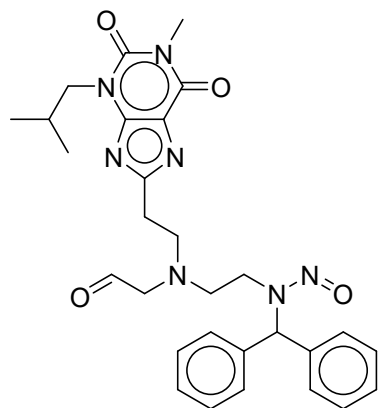

Row5286

N(CCN(CCCc1nc2n(CC(C)C)c(=O)n(C)c(=O)c2n1)N=O)(CC=O)C(c3ccccc3)c4ccccc4

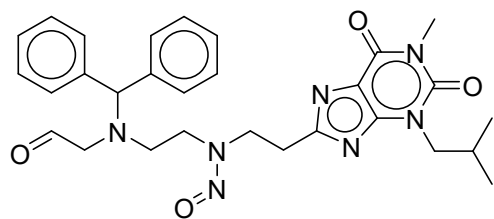

Row5381

[H][C@]6(N1CCCC1)CCc7ccc(N(N=O)c5nn(c4nnc3c(CCCc2ccccc23)c4)c(=N)n5)cc7C  
C6

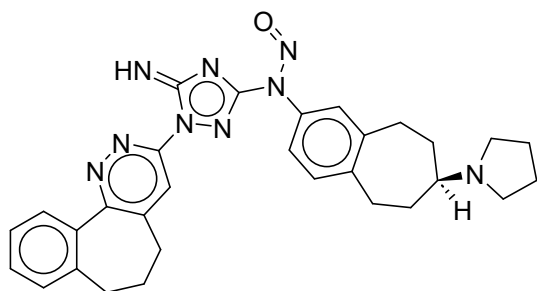

Row5382

[H][C@]5(N(CCCC=O)N=O)CCc6ccc(Nc4nn(c3nnc2c(CCCc1ccccc12)c3)c(=N)n4)cc6C  
C5

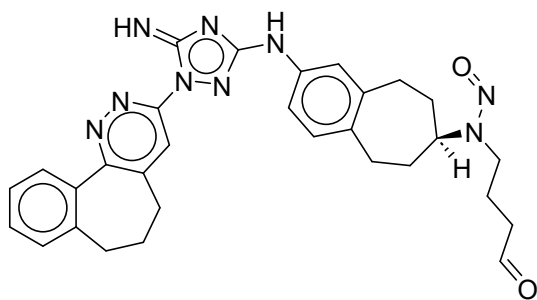

Row6365

[O-][n+]<sup>1</sup>c(N)cc(N(CCCCC=O)N=O)nc1=N

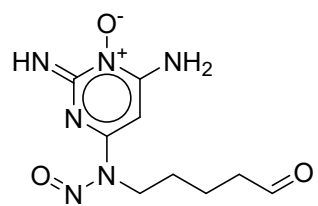

Supplement: d3gc03478j1.pdf [file d3gc03478j1.pdf]
